# Supplementary material for: Family and developmental history of female versus male adolescents with ADHD: diagnosis-specific overlap, few gender/sex differences
Source: Frontiers journal article supplement (doi:10.3389/fpsyt.2023.1072735), 2023-07-17

Recruitment and matching process

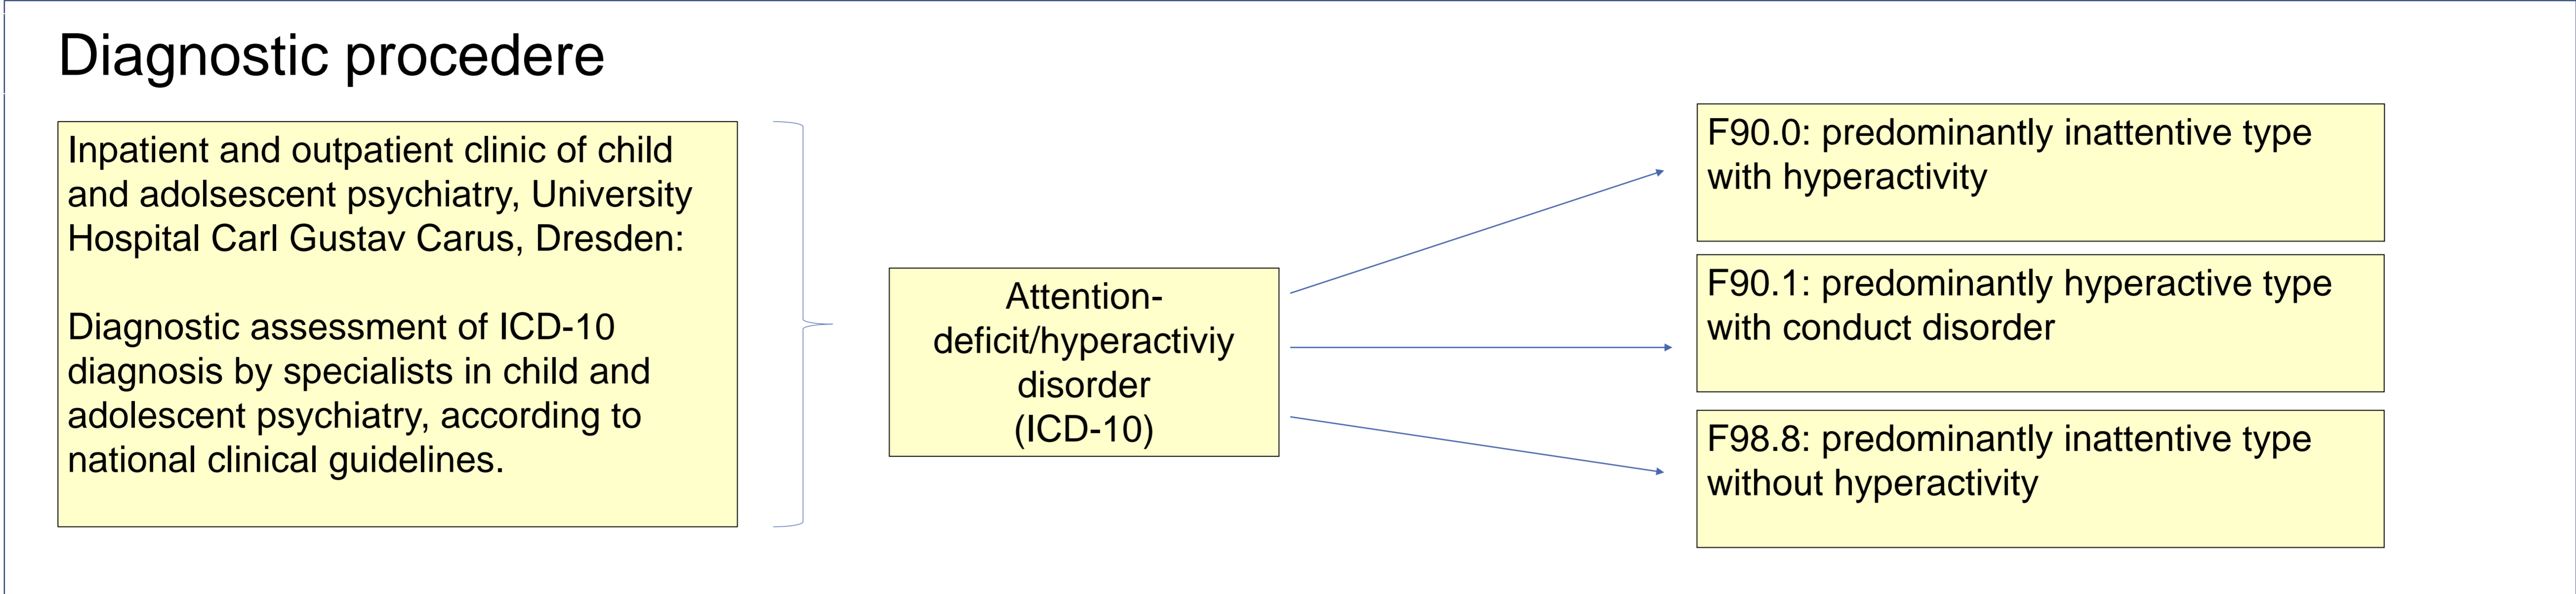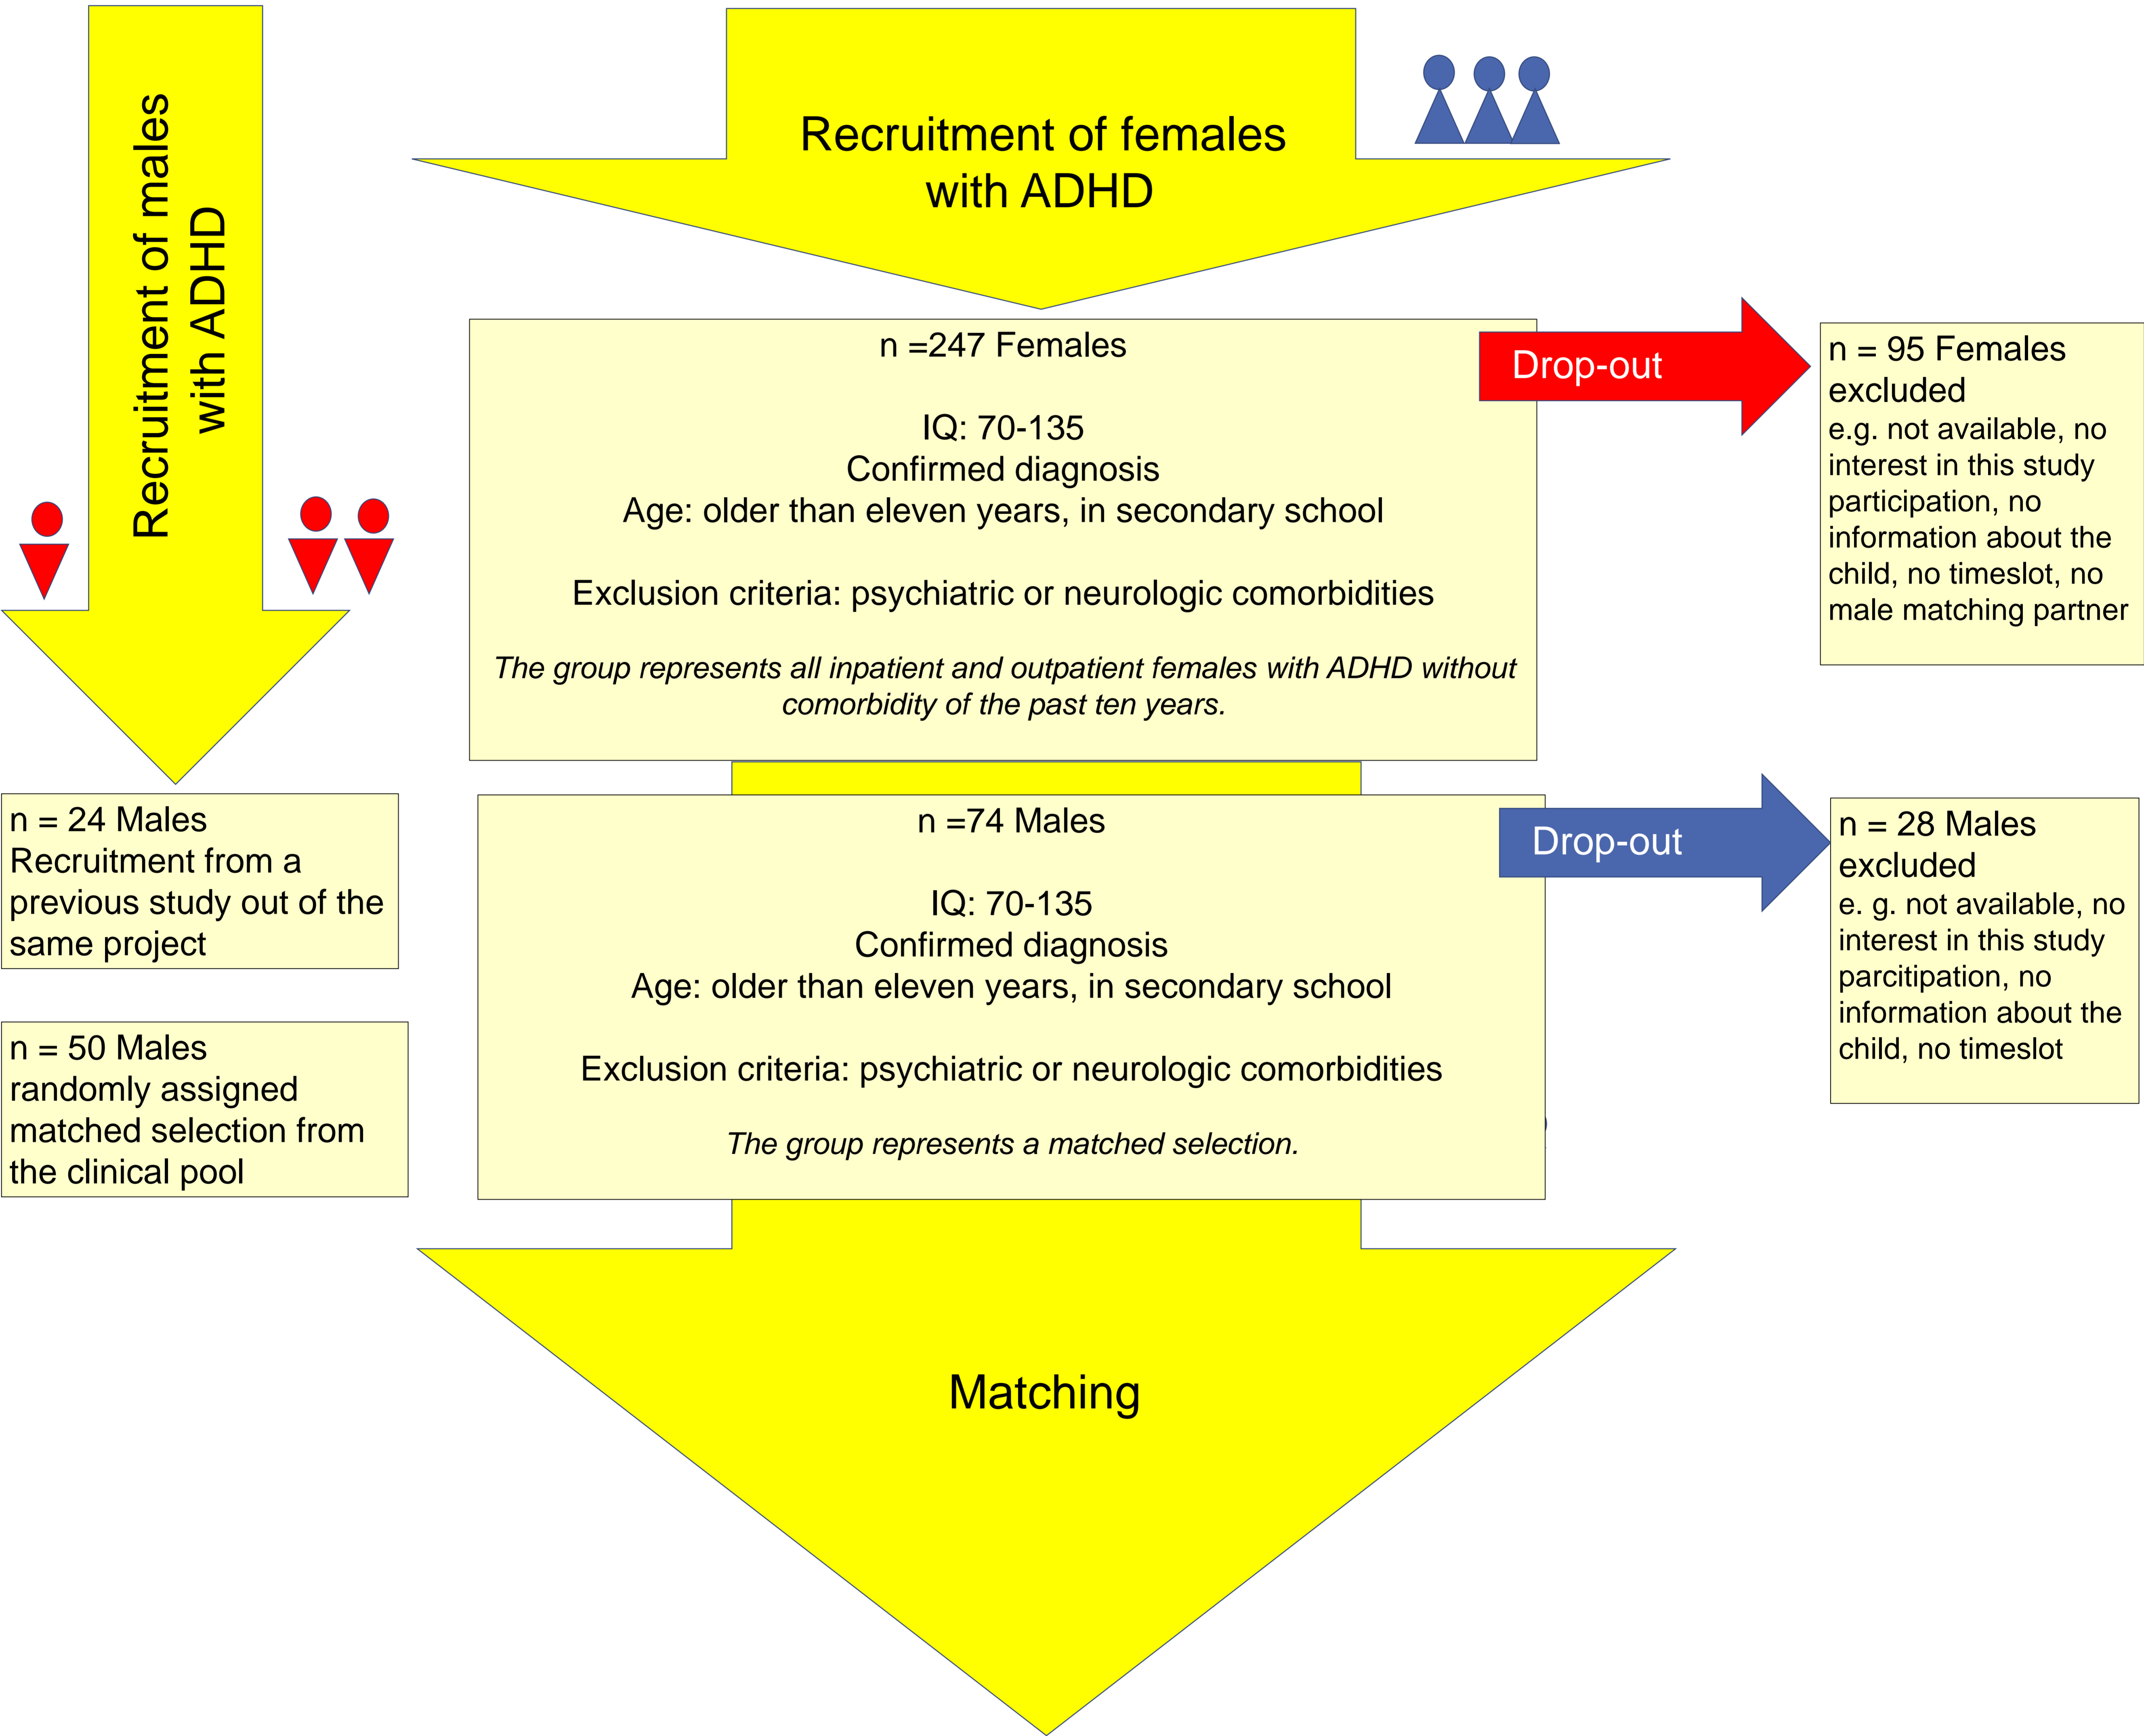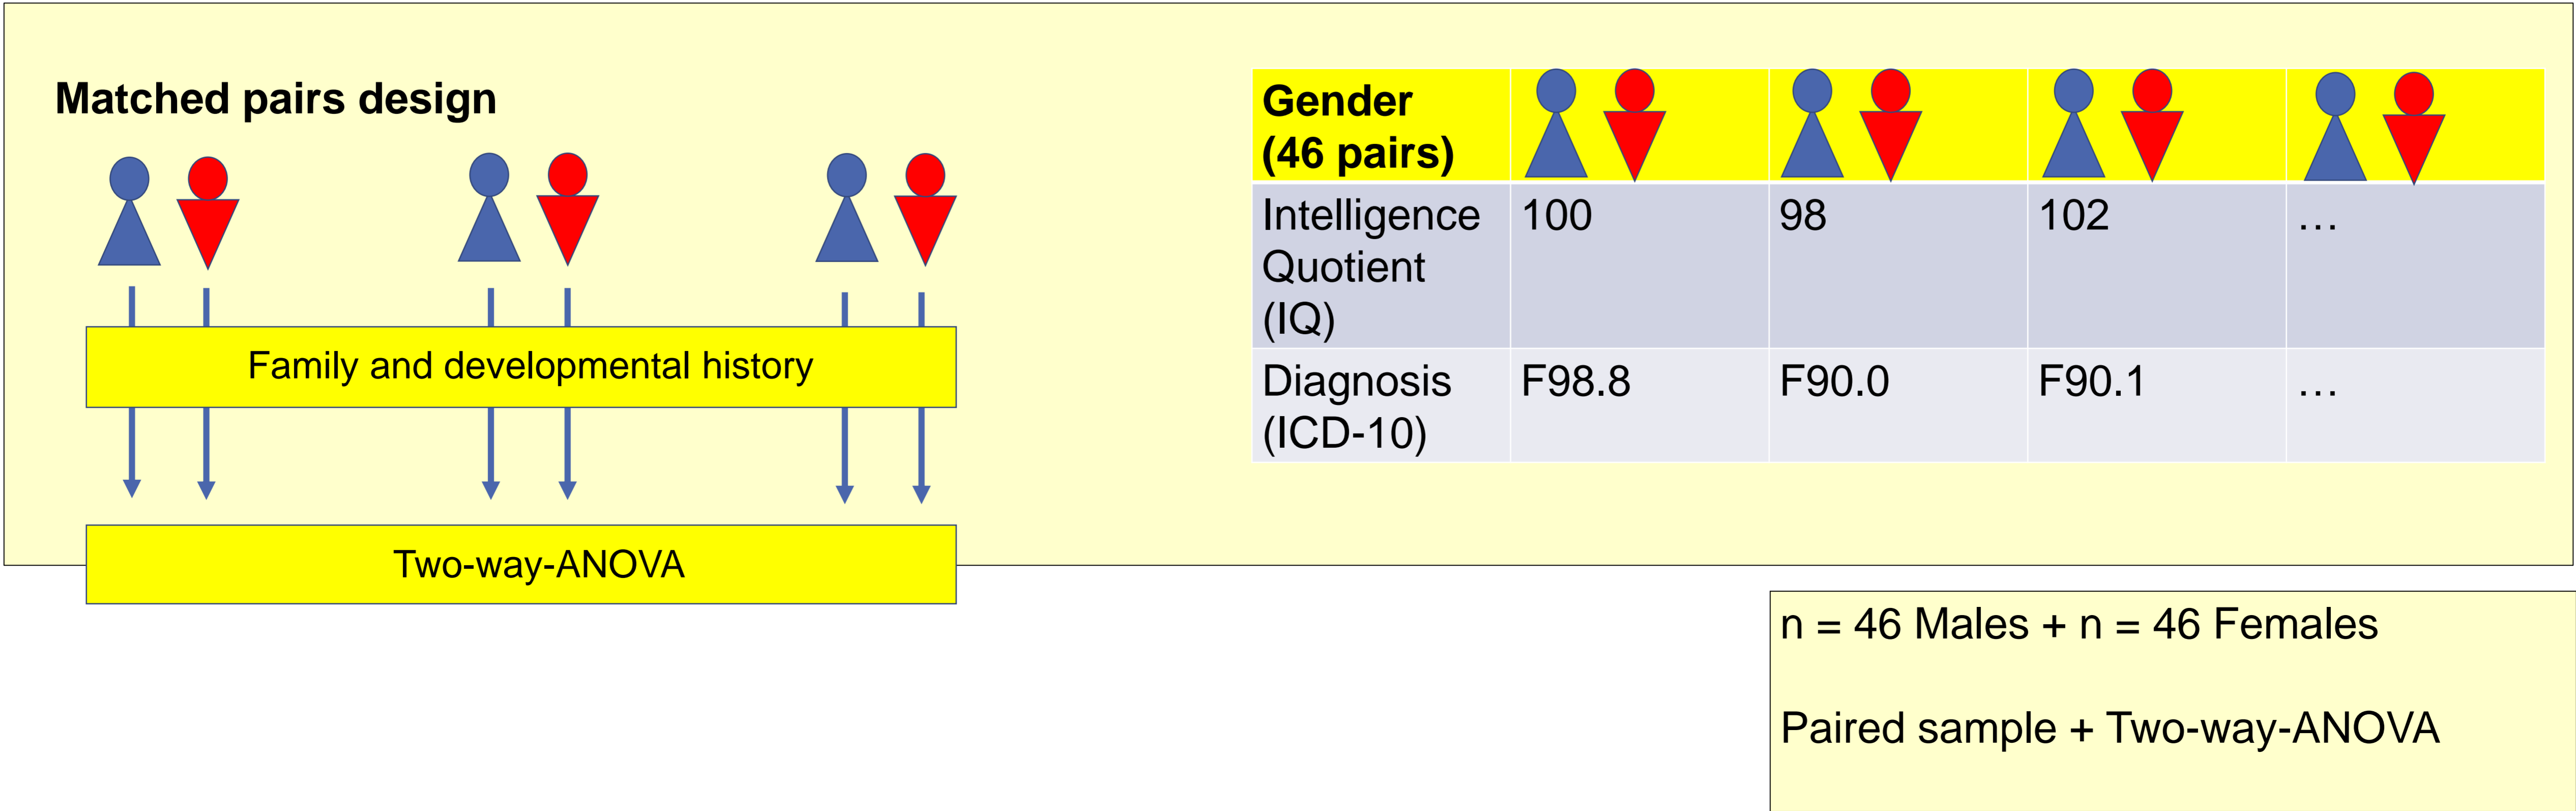

Supplement: Data_Sheet_1.PDF [file Data_Sheet_1.PDF]
