# Supplementary material for: Family and developmental history of female versus male adolescents with ADHD: diagnosis-specific overlap, few gender/sex differences
Source: Front Psychiatry. 2023 Jul 17;14:1072735. doi: 10.3389/fpsyt.2023.1072735 (PMC10390694; doi:10.3389/fpsyt.2023.1072735)
Supplement: Supplementary file 1 [file Table_1.xlsx]

## Sheet: Tabelle1
Family and developmental history questionnaire	Operationalization = 0	Operationalization = 1	Operationalization = 2	Metric answers	Figures and tables
FAMILY HISTORY
FAMILY CAREGIVERS, RELATIONSHIPS and FAMILY CONFLICTS
Number and composition of FAMILY CAREGIVERS at age 12-17
How many caregivers are living together with the child at age 12-17 in one home?
				Number of biological parents (n)	Table 2B
				Number of social parents (n)	Table 2B
				Number of grandparents (n)	Table 2B
				Number of other adult caregivers (n)	Table 2B
				Number of biological siblings (n)	Table 2B
				Number of half siblings (n)	Table 2B
				Number of social siblings (n)	Table 2B
				Number of peers in youth welfare institutions (n)	Table 2B
				Complete number of all persons living together with the child at the age 12-17 (n)	Table 2B
				Only child family (n)	Table 2B
				Separated parents	Table 2B
				Youth welfare institution	Table 2B
RELATIONSHIPS between important family members
How is the relationship between child and mother?	good	minor problem	major problem		Figure 2A
How is the relationship between child and father?	good	minor problem	major problem		Figure 2A
How is the relationship between child and sibling(s)?	good	minor problem	major problem		Figure 2A
How is the relationship between mother and father?	good	minor problem	major problem		Figure 2A
FAMILY CONFLICTS - PARENTING STYLE
There are always conflicts in every family. Were problems usually subsequently solved?	regularly	irregularly	no		Figure 2B
Did the family talk about feelings in order to solve problems?	regularly	irregularly	no		Figure 2B
Did the parents often quarrel about the same problems with their child?	no	irregularly	regularly		Figure 2B
Were there verbal aggressions towards the child in the family? Did someone regularly yell at the child? Was the child insulted?	no	irregularly	regularly		Figure 2B
Were there physical aggressions towards the child in the family? Did the child get slapped sometimes?	no	irregularly	regularly		Figure 2B
Was the child rejected in the family? Did the child have an outsider position in the family?	no	irregularly	regularly		Figure 2B
Did the child experience sexual abuse?	no	irregularly	regularly		Figure 2B
Did the child have a caregiver beyond the family members?	yes, more than one	yes, one	no		Figure 2B
PERSONAL HISTOTY OF PARENTS
Socioeconomic status of the mother
What is the highest school graduation of the mother?	high school	middle school	no school graduation		Figure 1A
What is the learned profession (academic or non-academic) of the mother?	academic	non-academic	unlearned		Figure 1A
Was the mother predominantly employed?	full time	part time	no		Figure 1A
Psychosocial situation at mothers own home
Did the mother experience her own parents' home as a stable home?	yes	not really	no		Figure 1B
Did the mother have regular contact with her own parents at time of the survey?	yes, with mother and father	yes, with mother or father	no, not with mother and not with father		Figure 1B
Psychiatric and medical diseases
Did the mother have a mental disorder?	no	minor problem	major problem		Figure 1C
Did the mother try to attempt suicide?	no	attempted suicide	committed suicide		Figure 1C
Did the mother have a physical disorder?	no	minor problem	major problem		Figure 1C
Obstetrical history
How many pregnancies did the mother have?				Number of pregnancies (n)	Table 1A
How many childbirths did the mother have?				Number of childbirths (n)	Table 1A
Psychiatric and medical history of maternal parents
Maternal mother
Did the grandmother have a mental disorder?	no	minor problem	major problem		Figure 1D
Did the grandmother try to attempt suicide?	no	attempted suicide	committed suicide		Figure 1D
Did the grandmother have a physical disorder?	no	minor problem	major problem		Figure 1D
Maternal father
Did the grandfather have a mental disorder?	no	minor problem	major problem		Figure 1E
Did the grandfather try to attempt suicide?	no	attempted suicide	committed suicide		Figure 1E
Did the grandfather have a physical disorder?	no	minor problem	major problem		Figure 1E
Socioeconomic status of father
What is the highest school graduation of the father?	high school	middle school	no school graduation		Figure 1F
What is the learned profession (academic or non-academic) of the father?	academic	non-academic	unlearned		Figure 1F
Was the father predominantly employed?	full time	part time	no		Figure 1F
Psychosocial situation at fathers own home
Did the father experience his own parents' home as a stable home?	yes	not really	no		Figure 1G
Did the father have contact with his own parents at time of the survey?	yes, with mother and father	yes, with mother or father	no, not with mother and not with father		Figure 1G
Psychiatric and medical diseases
Did the father have a mental disorder?	no	minor problem	major problem		Figure 1H
Did the father try to attempt suicide?	no	attempted suicide	committed suicide		Figure 1H
Did the father have a physical disorder?	no	minor problem	major problem		Figure 1H
Psychiatric and medical history of maternal parents
Paternal mother
Did the grandmother have a mental disorder?	no	minor problem	major problem		Figure 1I
Did the grandmother try to attempt suicide?	no	attempted suicide	committed suicide		Figure 1I
Did the grandmother have a physical disorder?	no	minor problem	major problem		Figure 1I
Paternal father
Did the grandfather have a mental disorder?	no	minor problem	major problem		Figure 1K
Did the grandfather try to attempt suicide?	no	attempted suicide	committed suicide		Figure 1K
Did the grandfather have a physical disorder?	no	minor problem	major problem		Figure 1K
DEVELOPMENTAL HISTORY
PRENATAL and PERINATAL HISTORY - psychosocial issues
Maternal psychosocial situation including maternal stress
Was the pregnancy planned or wanted?	yes, planned and wanted	not planned, but wanted	not planned and not wanted		Figure 3A
Was the mother during pregnancy supported by her partner/mother/friends?	regularly	irregularly	no		Figure 3A
Were work or financial issues during pregnancy a burden for the mother?	no	minor problem	major problem		Figure 3A
Was the mother during pregnancy under emotional pressure or did she feel stressed?	no	low stress	high stress		Figure 3A
Prenatal and perinatal history - psychiatric and medical issues
Were there maternal health problems during pregnancy?	no	minor problem	major problem		Figure 3B
Did the mother smoke cigarettes during pregnancy?	no	irregularly	regularly		Figure 3B
Did the mother drink alcohol during pregnancy?	no	irregularly	regularly		Figure 3B
Did the mother take illegal drugs during pregnancy?	no	irregularly	regularly		Figure 3B
Did the mother take prescribed medications during pregnancy?	no	irregularly	regularly		Figure 3B
Were there maternal complications during labour?	no	minor problem	major problem		Figure 3B
Were there maternal complications in the weeks after childbirth?	no	minor problem	major problem		Figure 3B
Birth parameters
How old was the mother at childbirth?				age of mother	Table 2C
How old was the father at childbirth?				age of father	Table 2C
In which week of pregnancy was the child born?				weeks of pregnancy	Table 2C
How was the birth weight?				birth weight	Table 2C
How was the birth size?				birth size	Table 2C
How was the APGAR-score at 5 and 10 min?				APGAR score	Table 2C
Medical complications of the child
Were there foetal complications during pregnancy?	no	minor problem	major problem		Figure 3C
Were there complications for the child during labour?	no	minor problem	major problem		Figure 3C
Were there infantile complications the weeks after childbirth?	no	minor problem	major problem		Figure 3C
EARLY CHILDHOOD (0-3 years)
Mother-child interaction (0-1 years)
How long was the child breastfed?				weeks of breastfeeding	Table 3D
Did the baby cry without apparent reason or did the baby cry continuously?	no	irregularly	regularly		Figure 3D
Did the baby have feeding problems?	no	minor problem	major problem		Figure 3D
Did the baby have sleeping problems?	no	minor problem	major problem		Figure 3D
Did the mother have the feeling to understand the needs of the baby? Did the mother know what to do, when the baby was crying?	regularly	irregularly	no		Figure 3D
Was there a separation of mother and child during the first three years (longer than one month)?	no	up to one month	longer than one month		Figure 3D
Did the mother experience a high level of stress at this time?	no	low stress	high stress		Figure 2C
Markers of development (0-6 years)
When did the child speak the first words except "mom" and "dad"?				months of first words	Table 2D
When did the child take the first free steps (without holding on)?				months of first free steps	Table 2D
How long was the child at a childminder or day nursery during the years 0-3?				stay duration in years	Table 2D
How long was the child at preschool during the years 3-6?				stay duration in years	Table 2D
Is your child right-handed? Or is it left-handed? Or is the handedness unclear?
				right-handedness	Table 2D
				ambidexterity	Table 2D
				left-handedness	Table 2D
Social and cognitive behaviour (1-3 years)
Did the child use gestures like waving or pointing with her/his finger at the first birthday?	regularly	irregularly	no		Figure 3E
Was the child looking for eye contact to show something to the parents?	regularly	irregularly	no		Figure 3E
Was the child interested in songs, rhymes or books at the age of one year?	regularly	irregularly	no		Figure 3E
Was the child speaking first sentences like "there - car" at her/his second birthday?	regularly	irregularly	no		Figure 3E
Around her/his second birthday, did the child know as many words as her/his peers?	yes	minor problem	major problem		Figure 3E
Was there a time when it suddenly became again difficult for the child to speak?	no	minor problem	major problem		Figure 3E
Maternal Stress during "terrible twos" (1-3 years)
During the phase of the "terrible twos", did the mother often feel overwhelmed?	no	low stress	high stress		Figure 2C
MIDDLE CHILDHOOD (3-10 years)
Preschool socio-emotional behaviour (3-6 years)
Part 1: Did the preschool teachers report abnormalities in the behaviour of the child? (yes - next question)	no -> next question	yes -> Part 2	yes -> Part 2
Part 2: If such behaviour was reported, was the child rather anxious and shy or was the child rather loudly and aggressive?		externalizing behaviour or internalizing behaviour -> Part 3	externalizing behaviour or internalizing behaviour -> Part 3
Part 3: Was the reported behaviour a mild or a severe problem in preschool?		minor problem	major problem		Figure 4A
Did the child have difficulties playing concentrated for a longer time?	no	minor problem	major problem		Figure 4A
Was the child invited to other children's birthday parties (at kindergarten age)?	regularly	irregularly	no		Figure 4A
Did the child invite no friends, few friends or many friends to her/his own birthday party?	regularly	irregularly	no		Figure 4A
Did the child have no friends, few friends or many friends at that time?	many friends	few friends	no friends		Figure 4A
Did the child likes to tinker, to cut out or to paint in preschool?	regularly	irregularly	no		Figure 4A
When did the child no longer need a diaper during the day?	before the third birthday	after the third birthday	after the fourth birthday		Figure 4A
Parental stress at preschool time (3-6 years)
Did the parent, who mostly spent time with the child, have a high stress level at this time?	no	low stress	high stress		Figure 2C
Primary school socio-emotional behaviour (6-10 years)
Where there difficulties in the transition from preschool to primary school?	no	minor problem	major problem		Figure 4B
Did the child start with school regularly? Was the child ready for school?	yes	no, the child started a year later	no, the child started in a school for special needs		Figure 4B
Part 1: Did the primary school teachers report abnormalities in the behaviour of the child?	no -> next question	yes -> Part 2	yes -> Part 2
Part 2: If such behaviour was reported, was the child rather scared and shy or was the child rather loudly and aggressive?		externalizing behaviour or internalizing behaviour -> Part 3	externalizing behaviour or internalizing behaviour -> Part 3
Part 3: Was the reported behaviour a mild or a severe problem at school?		minor problem	major problem		Figure 4B
Did the child have personal conflicts with teachers?	no	minor problem	major problem		Figure 4B
Did the child have personal conflicts with classmates?	no	minor problem	major problem		Figure 4B
Did the child have difficulties to stay quiet during lessons or did the child have difficulties to concentrate?	no	minor problem	major problem		Figure 4B
Was the child a loner or did the child withdraw from others?	no	minor problem	major problem		Figure 4B
Did the child like to go to primary school? Did she/he avoided going there? Or did she/he skip school?	yes	no, he didn't want to go to school	no, he skipped school		Figure 4B
Was the child invited to other children's birthday parties (at primary school age)?	regularly	irregularly	no		Figure 4B
Did the child have many friends, few friends or no friends at primary school?	many friends	few friends	no friends		Figure 4B
Primary school cognitive behaviour (6-10 years)
How were the child's school achievements?	good grades	middle grades	bad grades		Figure 4C
Did the child have problems with acquiring reading?	no	minor problem	major problem		Figure 4C
Did the child have problems with acquiring writing?	no	minor problem	major problem		Figure 4C
Did the child have problems to achieve good grades in writing dictations?	no	minor problem	major problem		Figure 4C
Did the child have problems with acquiring counting?	no	minor problem	major problem		Figure 4C
Did the child have problems with fine motor skills?	no	minor problem	major problem		Figure 4C
Did the child need speech therapy?	no	minor problem	major problem		Figure 4C
School performance in primary school
Did the child repeat one class in primary school?				class repetition	Table 2E
Was there a change of school during primary school time?				school change	Table 2E
Were school requirements reduced for the child at primary school?				reduced requirements	Table 2E
Did the child have special educational needs at primary school?				special educational needs setting	Table 2E
Parental stress, primary school time (6-10 years)
Did the parent, who mostly spent time with the child, have a high stress level at this time?	no	low stress	high stress		Figure 2C
LATE CHILDHOOD
Secondary school socio-emotional behaviour (10-17 years)
Part 1: Did the secondary school teachers report abnormalities to the behaviour of the child?	no -> next question	yes -> Part 2	yes -> Part 2
Part 2: If such behaviour was reported, was the child rather scared and shy or was the child rather loudly and aggressive?		externalizing behaviour or internalizing behaviour -> Part 3	externalizing behaviour or internalizing behaviour -> Part 3
Part 3: Was the reported behaviour a mild or a severe problem at school?		minor problem	major problem		Figure 4D
Did the child have personal problems with teachers?	no	minor problem	major problem		Figure 4D
Did the child have personal problems with classmates?	no	minor problem	major problem		Figure 4D
Did the child have difficulties to stay quiet during lessons or did the child have difficulties to concentrate?	no	minor problem	major problem		Figure 4D
Was the child a loner or did the child withdraw from others?	no	minor problem	major problem		Figure 4D
Did the child like to go to the secondary school? Did she/he avoid going there? Or did he/she skip school?	yes	no, he didn't want to go to school	no, he skipped school		Figure 4D
Did the child have many friends, few friends or no friends at secondary school?	many friends	few friends	no friends		Figure 4D
Secondary school cognitive behaviour (10-17 years)
How were the children's school achievements?	good grades	middle grades	bad grades		Figure 4E
Did the child have difficulties with mental arithmetic's at secondary school?	no	minor problem	major problem		Figure 4E
Did the child have problems with the orthography at secondary school?	no	minor problem	major problem		Figure 4E
Transition into secondary school
Which secondary school was chosen for the child after primary school?
				high school	Table 2F
				middle school, high performance	Table 2F
				middle school, low performance	Table 2F
				alternative school	Table 2F
MEDICAL HISTORY of the child (0-17 years)
Medical diseases
Did the child have febrile convulsions?	no	minor problem	major problem		Figure 2D
Did the child have skin diseases?	no	minor problem	major problem		Figure 2D
Did the child have seizure disorders (epilepsy)?	no	minor problem	major problem		Figure 2D
Did the child have brain disorders or nervous system disorders (inflammations/violations/malformations)?	no	minor problem	major problem		Figure 2D
Did the child have other physical illness or take medications?	no	minor problem	major problem		Figure 2D
Did the child have accidents?	no	minor problem	major problem		Figure 2D
Did the child have operations?	no	minor problem	major problem		Figure 2D
