# Supplementary material for: Family and developmental history of female versus male adolescents with ADHD: diagnosis-specific overlap, few gender/sex differences
Source: Front Psychiatry. 2023 Jul 17;14:1072735. doi: 10.3389/fpsyt.2023.1072735 (PMC10390694; doi:10.3389/fpsyt.2023.1072735)
Supplement: Supplementary file 2 [file Table_2.xlsx]

## Sheet: Tabelle1
	M (females)	M (males)	t ratio	df	p	Difference	SE of difference	Significance
Figure 1: Family history
Fig. 1A: Socioeconomic status of mother
School-leaving qualifcation	0.6667	0.6222	0.3836	88	0.702192	-0.04444	0.1159	ns
Learned profession	0.6889	0.6444	0.4041	88	0.687148	-0.04444	0.11	ns
Employment	0.4889	0.3333	1.378	88	0.171809	-0.1556	0.1129	ns
Fig. 1B: Psychosocial situation at mothers own home
Dysfunctional family	0.8444	0.3333	3.097	88	0.00261923	-0.5111	0.165	**
Contact with parents	0.1304	0.08696	0.5514	90	0.582718	-0.04348	0.07885	ns
Fig. 1C: Psychiatric and medical disorders of mother
Mental disorder	0.8222	0.5778	1.323	88	0.189139	-0.2444	0.1847	ns
Suicide attempts	0.08889	0.04444	0.839	88	0.403716	-0.04444	0.05297	ns
Physical disorder	0.5778	0.4667	0.78	88	0.437481	-0.1111	0.1424	ns
Fig. 1D: Psychiatric and medical disorders of maternal mother
Mental disorder	0.5556	0.3556	1.174	88	0.243396	-0.2	0.1703	ns
Suicide attempts	0.1556	0.1136	0.5249	87	0.600967	-0.04192	0.07986	ns
Physical disorder	0.9556	0.8636	0.5657	87	0.573021	-0.09192	0.1625	ns
Fig. 1E: Psychiatric and medical disorders of maternal father
Mental disorder	0.4091	0.4091	0	86	>0,999	0	0.1678	ns
Suicide attempts	0.04545	0.04545	0	86	>0,999	0	0.04492	ns
Physical disorder	0.8636	0.8636	0	86	>0,999	0	0.1632	ns
Fig. 1F: Socioeconomic status of father
School-leaving qualification	0.7209	0.6889	0.2379	86	0.812505	-0.03204	0.1347	ns
Learned profession	0.7955	0.6889	0.8186	87	0.41527	-0.1066	0.1302	ns
Employment	0.2222	0.2889	0.5013	88	0.617435	0.06667	0.133	ns
Fig. 1G Psychosocial situation at fathers own home
Dysfunctional family	0.6444	0.5682	0.452	87	0.652417	-0.07626	0.1687	ns
Contact with parents	0.2609	0.1957	0.5597	90	0.577098	-0.06522	0.1165	ns
Fig. 1H Psychiatric and medical disorders of father
Mental disorder	0.5682	0.5333	0.1947	87	0.846069	-0.03485	0.179	ns
Suicide attempts	0.02326	0.04444	0.5422	86	0.589079	0.02119	0.03908	ns
Physical disorder	0.5909	0.4889	0.6776	87	0.49985	-0.102	0.1506	ns
Fig. 1I: Psychiatric and medical disorders of paternal mother
Mental disorder	0.7381	0.4222	1.737	85	0.0860919	-0.3159	0.1819	ns
Suicide attempts	0.02381	0.06818	0.7847	84	0.434837	0.04437	0.05655	ns
Physical disorder	0.9286	0.7955	0.6964	84	0.488075	-0.1331	0.1911	ns
Fig. 1K: Psychiatric and medical disorders of paternal father
Mental disorder	0.2564	0.2821	0.171	76	0.864702	0.02564	0.15	ns
Suicide attempts	0	0.1538	1.756	75	0.0831278	0.1538	0.0876	ns
Physical disorder	0.7949	0.8718	0.38	76	0.70498	0.07692	0.2024	ns
Figure 2: Developmental history - relationships, conflicts, maternal stress and medical diseases of the child
Fig. 2A: Relationships in the family
Mother and child	0.4783	0.3556	0.9229	89	0.358564	0.1227	0.133	ns
Father and child	0.5	0.4565	0.297	88	0.767171	0.04348	0.1464	ns
Siblings and child	0.4848	0.4324	0.3334	68	0.739885	0.05242	0.1572	ns
Mother and father	0.6512	0.5294	0.6615	75	0.510312	0.1218	0.1841	ns
Fig. 2B: Conflicts in the family
Solving problems	0.8478	0.6304	1.25	90	0.214698	0.2174	0.174	ns
Talking about emotions	0.5	0.5652	0.4433	90	0.658619	-0.06522	0.1471	ns
Persistent problems	1.63	1.783	1.145	90	0.25512	-0.1522	0.1329	ns
Verbal aggressions	0.9565	0.913	0.2868	90	0.774908	0.04348	0.1516	ns
Physical aggressions	0.5652	0.5	0.503	90	0.616222	0.06522	0.1297	ns
Outsider position	0.5	0.3696	0.8924	90	0.374534	0.1304	0.1462	ns
Sexual abuse	0.1304	0.08696	0.5514	90	0.582718	0.04348	0.07885	ns
Other caregivers	0.8913	0.4783	2.835	90	0.00565576	0.413	0.1457	**
Fig. 2C: Maternal stress
0-1 yr	0.4783	0.3556	0.9229	89	0.358564	0.1227	0.133	ns
1-3 yr	0.5	0.4565	0.297	88	0.767171	0.04348	0.1464	ns
3-6 yr	0.4848	0.4324	0.3334	68	0.739885	0.05242	0.1572	ns
6-10 yr	0.6512	0.5294	0.6615	75	0.510312	0.1218	0.1841	ns
Fig. 2D: Medical history of the child
Physical diseases	0.7391	0.5	1.974	90	0.0514201	0.2391	0.1211	ns
Dermatological diseases	0.3913	0.3696	0.2125	90	0.832236	0.02174	0.1023	ns
Neurological diseases	0.2826	0.2174	0.678	90	0.499501	0.06522	0.09619	ns
Febrile convulsions	0.08696	0.08696	0	90	>0,999	0	0.06704	ns
Epilepsy	0.04348	0	1.43	90	0.156124	0.04348	0.0304	ns
Surgical operations	0.6522	0.4565	1.751	90	0.0833729	0.1957	0.1117	ns
Accidents	0.7391	0.7391	0	90	>0,999	0	0.1238	ns
Figure 3: Developmental history - prenatal, perinatal and early childhood
Fig. 3A: Prenatal and perinatal: maternal psychosocial situation
Desired pregnancy	0.4667	0.5217	0.3793	89	0.705364	0.05507	0.1452	ns
Social support	0.3778	0.1333	1.993	88	0.0493291	-0.2444	0.1226	*
Stress/emotional burden	0.8	0.7333	0.383	88	0.702665	-0.06667	0.1741	ns
Economic burden	0.5116	0.4	0.7193	86	0.473912	-0.1116	0.1552	ns
Fig. 3B: Prenatal and perinatal: psychiatric and medical complications of mother
In pregnancy	0.4667	0.4889	0.1638	88	0.870267	0.02222	0.1357	ns
Prescribed medications	0.2	0.3111	0.8627	88	0.390648	0.1111	0.1288	ns
Nicotine abuse	0.2889	0.1556	1.099	88	0.274861	-0.1333	0.1213	ns
Alcohol abuse	0.2	0.2	0	88	>0,999	0	0.1015	ns
Drug abuse	0	0	0	88	>0,999	0	0	ns
During labor	0.2889	0.3913	0.9003	89	0.370413	0.1024	0.1138	ns
After childbirth	0.2889	0.3696	0.5892	89	0.557248	0.08068	0.1369	ns									88
Fig. 3C: Prenatal and perinatal: medical complications of the child
In pregnancy	0.06667	0.06667	0	88	>0,999	0	0.05318	ns
During labour	0.2889	0.3261	0.32	89	0.749704	0.0372	0.1162	ns
After childbirth	0.4444	0.4348	0.07014	89	0.94424	-0.009662	0.1378	ns
Fig. 3D: Early childhood: mother-child interaction (0-1 yr.)
Crying behaviour	0.2391	0.587	2.163	90	0.0331816	0.3478	0.1608	*
Feeding problems	0.2174	0.2	0.1631	89	0.870831	-0.01739	0.1066	ns
Sleeping problems	0.3913	0.4783	0.5571	90	0.578851	0.08696	0.1561	ns
Sensitivity of mother	0.2609	0.2391	0.2052	90	0.837901	-0.02174	0.106	ns
Early separation	0.4565	0.3478	0.85	90	0.397567	-0.1087	0.1279	ns
Fig. 3E: Early childhood: social and cognitive behaviour (1-3 yrs.)
Gestures	0.02174	0.02222	0.01554	89	0.987635	-0.0004831	0.03108	ns
Eye contact	0.02174	0.08889	1.405	89	0.163426	-0.06715	0.04778	ns
Interest in language	0.1739	0.06667	1.573	89	0.119226	0.1072	0.06817	ns
Double-word sentences	0.1087	0.1333	0.3	89	0.764894	-0.02464	0.08213	ns
Active vocabulary	0.2174	0.1304	0.8624	90	0.390738	0.08696	0.1008	ns
Difficulties with speech	0.8478	0.6739	0.9887	90	0.325444	0.1739	0.1759	ns
Figure 4: Developmental history - Middle and late childhood
Fig. 4A: Middle childhood - preschool: social and cognitive behaviour (3-6 yrs.)
Internalising behaviour	0.3696	0.2609	0.8066	90	0.422001	0.1087	0.1348	ns
Externalising behaviour	0.7174	0.7391	0.1254	90	0.900475	-0.02174	0.1733	ns
Concentration	0.8913	0.8696	0.122	90	0.903133	0.02174	0.1781	ns
Invitations to birthdays	0.6957	0.7826	0.6137	90	0.540993	-0.08696	0.1417	ns
Celebrating own birthday	0.3913	0.5652	1.163	90	0.247763	-0.1739	0.1495	ns
Friends	0.6522	0.5435	0.85	90	0.397567	0.1087	0.1279	ns
Fine motor skills	1.478	0.9348	2.992	90	0.00357239	0.5435	0.1816	**
Cleanliness development	0.08696	0.1957	1.203	90	0.232025	-0.1087	0.09033	ns
Fig. 4B: Middle childhood . Primary school: socio-emotional behaviour (6-10 yrs.)
Transition complications	0.4783	0.3913	0.5571	90	0.578851	0.08696	0.1561	ns
Internalising behaviour	0.3261	0.5217	1.348	90	0.18094	-0.1957	0.1451	ns
Externalising behaviour	0.7826	0.9783	1.073	90	0.286071	-0.1957	0.1823	ns
Difficulties with teachers	0.4565	0.6444	1.133	89	0.26038	-0.1879	0.1659	ns
Difficulties with teachers after school change	0.08333	0.75	2.53	22	0.0190802	-0.6667	0.2635	ns
Difficulties with peers	1.022	0.8	1.265	89	0.209078	0.2217	0.1753	ns
Difficulties with peers after school change	1	0.9231	0.224	23	0.824725	0.07692	0.3434	ns
Loneliness	0.6522	0.6304	0.1411	90	0.888124	0.02174	0.1541	ns
Accepting school	0.4348	0.4783	0.3024	90	0.763023	-0.04348	0.1438	ns
Invitations to birthdays	0.7556	0.8478	0.6105	89	0.543086	-0.09227	0.1511	ns
Friends	0.6522	0.8261	1.266	90	0.208667	-0.1739	0.1373	ns
Fig. 4C: Middle childhood - primary school: cognitive behaviour (6-10 yrs.)
School readiness	0.1522	0.08696	0.8717	90	0.385695	0.06522	0.07482	ns
Achievements	0.6977	0.6364	0.4571	85	0.648743	0.06131	0.1341	ns
Concentration	1.587	1.652	0.528	90	0.598832	-0.06522	0.1235	ns
Concentration after school change	1	1.583	2.115	23	0.0454667	-0.5833	0.2758	*
Reading skills	0.6304	0.587	0.2515	90	0.802009	0.04348	0.1729	ns
Writing skills	1.022	0.9565	0.3575	90	0.72156	0.06522	0.1824	ns
Dictation skills	0.9111	1.114	1.064	87	0.290108	-0.2025	0.1903	ns
Calculation skills	0.5	0.8261	1.946	90	0.0547445	-0.3261	0.1675	ns
Fine motor skills	0.8261	0.3913	2.654	90	0.00941169	0.4348	0.1638	**
Fig 4D: Late childhood: socio-emotional behaviour (10-17 yrs.)
Internalising behaviour	0.413	0.3182	0.6784	88	0.49931	0.09486	0.1398	ns
Externalising behaviour	0.8261	0.7955	0.1734	88	0.862743	0.03063	0.1767	ns
Difficulties with teachers	0.5217	0.6818	0.943	88	0.34824	-0.1601	0.1697	ns
Difficulties with peers	0.8261	0.9773	0.8434	88	0.401268	-0.1512	0.1792	ns
Loneliness	0.587	0.5682	0.1117	88	0.911345	0.01877	0.1681	ns
Accepting school	0.587	0.5909	0.02274	88	0.981909	-0.003953	0.1738	ns
Friends	0.7174	0.6818	0.2362	88	0.813792	0.03557	0.1506	ns
Fig. 4E: Late childhood: cognitive behaviour (10-17 yrs.)
Achievements	0.9783	0.9545	0.165	88	0.869329	0.02372	0.1437	ns
Concentration	1.413	1.5	0.5694	88	0.570523	-0.08696	0.1527	ns
Calculation	0.4318	0.9556	2.91	87	0.00459176	-0.5237	0.18	**
Orthography	0.9348	1.067	0.7326	89	0.465708	-0.1319	0.18	ns
